# Supplementary material for: A Green HPLC Approach to Florfenicol Analysis in Pig Urine
Source: MDPI journal article supplement (doi:10.3390/ph17040495), 2024-04-12
Supplement: s1 [file s1]

**Table S1.** System suitability results for the florfenicol (FF) analytical method using chloramphenicol (CAP) as an internal standard.

| Parameters *                | Reference value | Standard solution   |          | Urine solution      |          |
|-----------------------------|-----------------|---------------------|----------|---------------------|----------|
|                             |                 | average $\pm$ SD ** | %RSD *** | average $\pm$ SD ** | %RSD *** |
| Retention time ( $t_R$ )    |                 |                     |          |                     |          |
| FF                          | -               | 14.03 $\pm$ 0.02    | 0.13     | 13.82 $\pm$ 0.03    | 0.20     |
| CAP                         | -               | 15.07 $\pm$ 0.01    | 0.09     | 14.83 $\pm$ 0.02    | 0.15     |
| Resolution ( $R_s$ )        | $\geq 2.0$      | 3.52 $\pm$ 0.02     | 0.71     | 3.38 $\pm$ 0.05     | 1.35     |
| System repeatability (%RSD) |                 |                     |          |                     |          |
| FF peak area                | $\leq 2.0$      | 1374603 $\pm$ 5631  | 0.41     | 1362532 $\pm$ 5750  | 0.42     |
| CAP peak area               | $\leq 2.0$      | 1745815 $\pm$ 17056 | 0.98     | 1696077 $\pm$ 19546 | 1.15     |
| Retention factor ( $k$ )    |                 |                     |          |                     |          |
| FF                          | 1-10            | 6.02 $\pm$ 0.01     | 0.15     | 5.91 $\pm$ 0.01     | 0.23     |
| CAP                         | 1-10            | 6.53 $\pm$ 0.01     | 0.11     | 6.42 $\pm$ 0.01     | 0.17     |
| Symmetry factor ( $A_s$ )   |                 |                     |          |                     |          |
| FF                          | 0.8-1.5         | 1.34 $\pm$ 0.01     | 0.58     | 1.38 $\pm$ 0.01     | 0.42     |
| CAP                         | 0.8-1.5         | 1.34 $\pm$ 0.005    | 0.35     | 1.41 $\pm$ 0.01     | 0.39     |
| Plate number ( $N$ )        |                 |                     |          |                     |          |
| FF                          | > 2000          | 34829 $\pm$ 433     | 1.24     | 32385 $\pm$ 455     | 1.40     |
| CAP                         | > 2000          | 43686 $\pm$ 707     | 1.62     | 40080 $\pm$ 514     | 1.28     |

\* System suitability tests were performed in standard (reference) solution and urine (blank sample) solution that contained FF at a concentration of 5.0  $\mu\text{g/mL}$  and CAP at a concentration of 10.0  $\mu\text{g/mL}$ .

\*\* Standard deviation (SD).

\*\*\* Relative standard deviation expressed as a percentage (%RSD).
