# Supplementary material for: A Green HPLC Approach to Florfenicol Analysis in Pig Urine
Source: MDPI journal article supplement (doi:10.3390/ph17040495), 2024-04-12
Supplement: s1 [file s1]

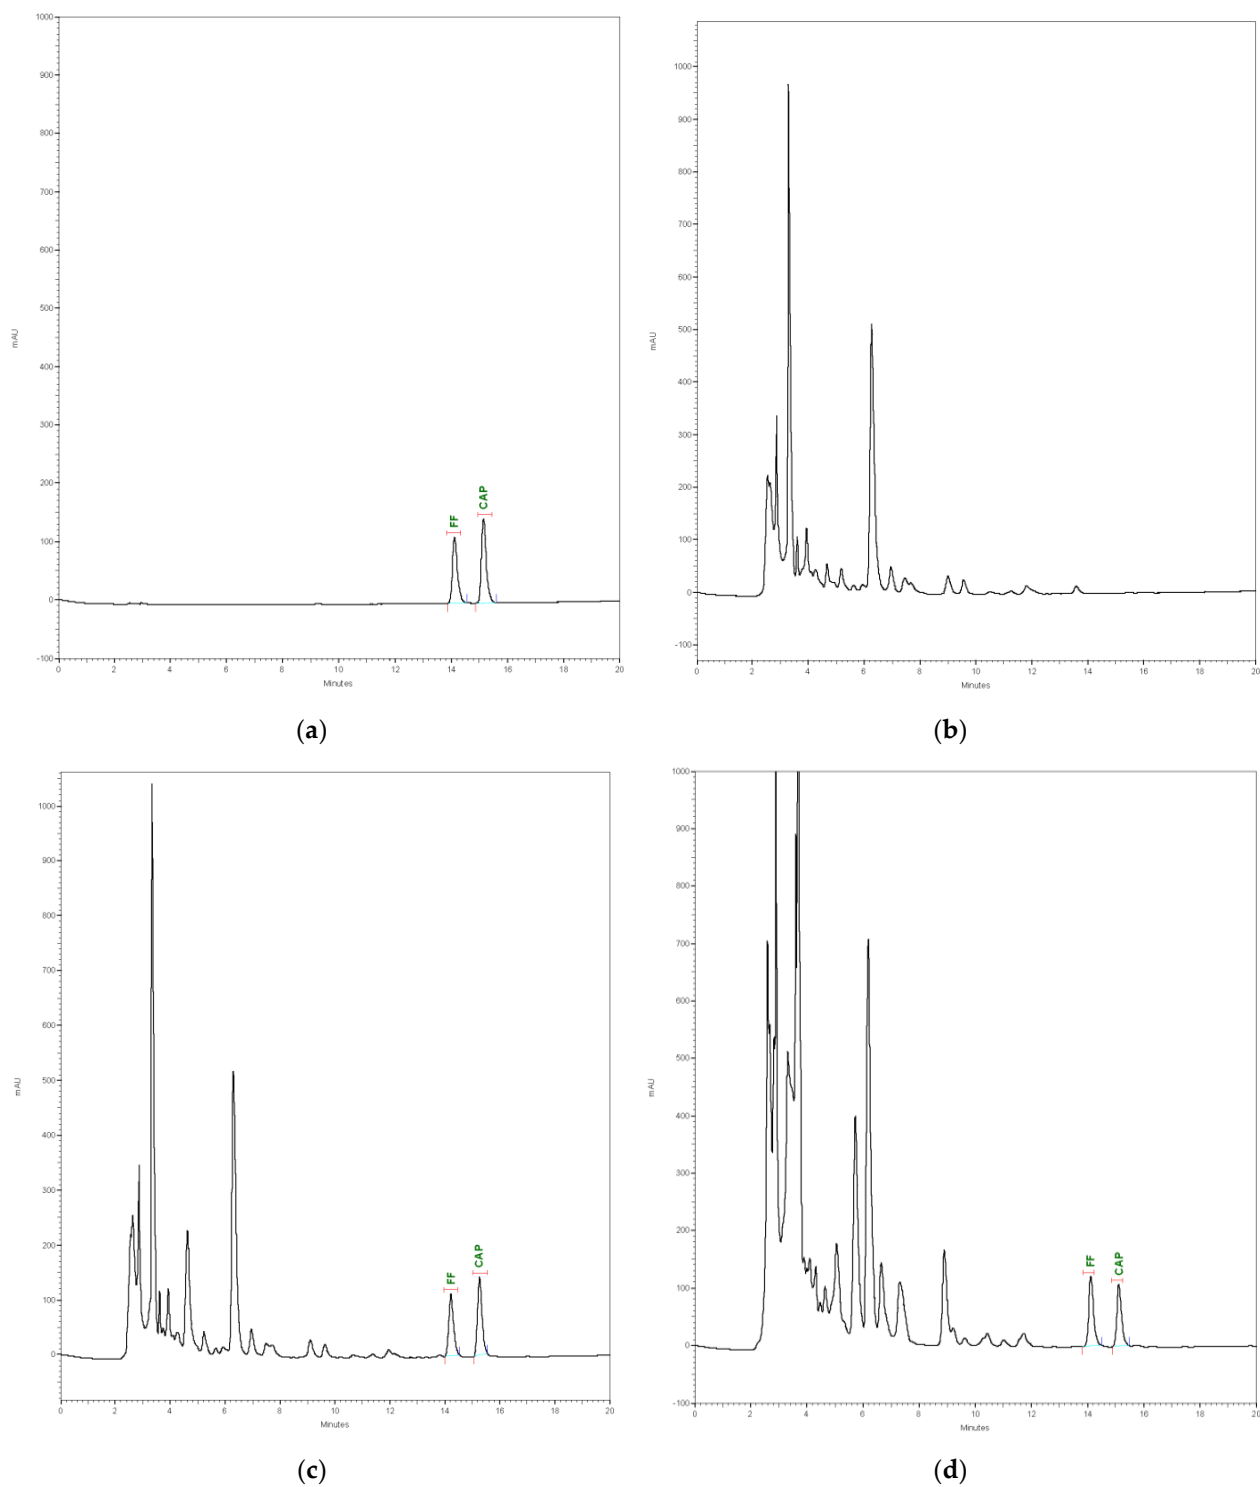

**Figure S1.** Chromatogram of: (a) standard solution containing 5.0  $\mu\text{g/mL}$  of florfenicol (FF) and 10.0  $\mu\text{g/mL}$  of chloramphenicol (CAP); (b) blank urine sample of pig from the control group; (c) pig urine from control group spiked with 5.0  $\mu\text{g/mL}$  of FF and 10.0  $\mu\text{g/mL}$  of CAP; (d) urine sample of the treated pig spiked with 10.0  $\mu\text{g/mL}$  of CAP.
